# Supplementary material for: Association between inflammatory diet and cognitive function with the moderating role of workforce participation in older adults: findings from NHANES 2011-2014
Source: Research Square preprint supplement (doi:10.21203/rs.3.rs-6694387/v1), 2025-06-17
Supplement: Supplementary file 1 [file 2698bf74b0cf1100c844d4cc.docx]

**Supplementary Material**

**eTable 1** Subgroup analysis for the association of inflammatory diet with CERAD-DR, CERAD-IR, AFT, and DSST z-scores, non-multiple imputation data was used.a

| **Characteristics** | **CERAD-DR Z-score** | | **CERAD-IR Z-score** | | **AFT z-score** | | **DSST z-score** | |
| --- | --- | --- | --- | --- | --- | --- | --- | --- |
| ***β* (95%CI)** | ***P* for interaction** | ***β* (95%CI)** | ***P* for interaction** | ***β* (95%CI)** | ***P* for interaction** | ***β* (95%CI)** | ***P* for interaction** |
| **Gender** |  | **0.686** |  | **0.614** |  | **0.223** |  | **0.455** |
| Male | -0.18 (-0.30, -0.06) |  | -0.20 (-0.32, -0.09) |  | -0.36 (-0.49, -0.24) |  | -0.36 (-0.47, -0.25) |  |
| Female | -0.21 (-0.34, -0.07) |  | -0.15 (-0.28, -0.01) |  | -0.24 (-0.37, -0.11) |  | -0.41 (-0.55, -0.28) |  |
| **Age (years)** |  | **0.798** |  | **0.994** |  | **0.521** |  | **0.723** |
| 60-69 | -0.16 (-0.28, -0.04 |  | -0.12 (-0.24, -0.01) |  | -0.36 (-0.49, -0.23) |  | -0.37 (-0.49, -0.24) |  |
| 70-79 | -0.16 (-0.32, 0.00) |  | -0.13 (-0.30, 0.03) |  | -0.27 (-0.43, -0.11) |  | -0.32 (-0.47, -0.17) |  |
| ≥ 80 | -0.09 (-0.32, 0.15) |  | -0.14 (-0.38, 0.10) |  | -0.21 (-0.40, -0.02) |  | -0.27 (-0.46, -0.07) |  |
| **Race** |  | **0.508** |  | **0.069** |  | **0.090** |  | **0.364** |
| Non-Hispanic White | -0.12 (-0.25, 0.00) |  | -0.18 (-0.30, -0.06) |  | -0.32 (-0.44, -0.21) |  | -0.26 (-0.37, -0.15) |  |
| Non-Hispanic Black | -0.18 (-0.40, -0.03) |  | 0.01 (-0.20, 0.22) |  | -0.20 (-0.39, -0.01) |  | -0.23 (-0.42, -0.04) |  |
| Mexican American | 0.14 (-0.19, 0.47) |  | -0.04 (-0.36, 0.29) |  | -0.48 (-0.80, -0.16) |  | 0.01 (-0.33, 0.34) |  |
| Other Hispanic | -0.09 (-0.40, 0.22) |  | 0.22 (-0.10, 0.54) |  | 0.09 (-0.20, 0.38) |  | -0.24 (-0.55, 0.08) |  |
| Other/Multiracial | -0.04 (-0.31, 0.23) |  | -0.10 (-0.42, 0.22) |  | -0.04 (-0.31, 0.22) |  | -0.29 (-0.55, -0.03) |  |
| **Education** |  | **0.472** |  | **0.340** |  | **0.962** |  | **0.374** |
| Less than high school | -0.06 (-0.28, 0.16) |  | -0.04 (-0.27, 0.18) |  | -0.23 (-0.41, -0.04) |  | -0.17 (-0.35, 0.01) |  |
| High school | 0.07 (-0.14, 0.27) |  | 0.14 (-0.06, 0.33) |  | -0.18 (-0.36, 0.01) |  | -0.02 (-0.19, 0.16) |  |
| Some college | -0.08 (-0.24, 0.08) |  | -0.09 (-0.25, 0.06) |  | -0.16 (-0.32, 0.00) |  | -0.21 (-0.36, -0.06) |  |
| College or above | -0.14 (-0.30, 0.02) |  | -0.07 (-0.23, 0.09) |  | -0.19 (-0.37, -0.02) |  | -0.19 (-0.33, -0.05) |  |
| **Marital Status** |  | **0.502** |  | **0.221** |  | **0.937** |  | **0.756** |
| Married/living with partner | -0.09 (-0.21, 0.02) |  | -0.13 (-0.25, -0.02) |  | -0.29 (-0.41, -0.18) |  | -0.33 (-0.44, -0.23) |  |
| Widowed/divorced/separated | -0.21 (-0.38, -0.04) |  | -0.02 (-0.19, 0.15) |  | -0.31 (-0.47, -0.15) |  | -0.25 (-0.42, -0.08) |  |
| Never married | -0.13 (-0.50, 0.25) |  | -0.41 (-0.83, 0.00) |  | -0.24 (-0.63, 0.15) |  | -0.32 (-0.70, 0.05) |  |
| **Poverty Income Ratio (PIR)** |  | **0.760** |  | **0.909** |  | **0.883** |  | **0.250** |
| Poor | -0.08 (-0.36, 0.20) |  | -0.10 (-0.37, 0.17) |  | -0.29 (-0.55, -0.03) |  | -0.14 (-0.40, 0.12) |  |
| Not poor | -0.13 (-0.22, -0.03) |  | -0.10 (-0.20, -0.01) |  | -0.28 (-0.38, -0.19) |  | -0.30 (-0.39, -0.21) |  |
| **Drinking Status** |  | **0.416** |  | **0.312** |  | **0.776** |  | **0.977** |
| Non-drinker | -0.03 (-0.21, 0.16) |  | -0.01 (-0.20, 0.18) |  | -0.20 (-0.36, -0.03) |  | -0.32 (-0.49, -0.14) |  |
| 1-5 drinks/month | -0.20 (-0.33, -0.07) |  | -0.17 (-0.30, -0.05) |  | -0.29 (-0.42, -0.16) |  | -0.30 (-0.43, -0.17) |  |
| 5-10 drinks/month | -0.34 (-0.77, 0.10) |  | -0.40 (-0.81, 0.02) |  | -0.49 (-0.92, -0.06) |  | -0.33 (-0.76, 0.10) |  |
| 10+ drinks/month | -0.09 (-0.29, 0.11) |  | -0.04 (-0.24, 0.17) |  | -0.25 (-0.45, -0.05) |  | -0.24 (-0.43, -0.05) |  |
| **Smoking Status** |  | **0.605** |  | **0.273** |  | **0.516** |  | **0.349** |
| Never smoker | -0.13 (-0.26, 0.00) |  | -0.17 (-0.31, -0.03) |  | -0.31 (-0.43, -0.18) |  | -0.36 (-0.49, -0.24) |  |
| Former smoker | -0.16 (-0.30, -0.03) |  | -0.10 (-0.23, 0.03) |  | -0.25 (-0.39, -0.11) |  | -0.28 (-0.41, -0.14) |  |
| Current smoker | -0.04 (-0.37, 0.28) |  | 0.11 (-0.20, 0.42) |  | -0.47 (-0.77, -0.17) |  | -0.19 (-0.49, 0.10) |  |
| **Sleep Disorder** |  | **0.315** |  | **0.640** |  | **0.910** |  | **0.574** |
| Yes | -0.28 (-0.56, -0.01) |  | -0.21 (-0.50, 0.07) |  | -0.30 (-0.57, -0.03) |  | -0.27 (-0.53, -0.02) |  |
| No | -0.12 (-0.22, -0.02) |  | -0.11 (-0.20, -0.01) |  | -0.31 (-0.40, -0.21) |  | -0.33 (-0.43, -0.24) |  |
| **Physical Activities** |  | **0.678** |  | **0.437** |  | **0.168** |  | **0.222** |
| Inactive | -0.07 (-0.20, 0.05) |  | -0.03 (-0.16, 0.10) |  | -0.24 (-0.37, -0.12) |  | -0.28 (-0.40, -0.15) |  |
| Moderate | -0.16 (-0.31, -0.01) |  | -0.17 (-0.32, -0.01) |  | -0.33 (-0.47, -0.18) |  | -0.30 (-0.44, -0.16) |  |
| Vigorous | -0.04 (-0.28, 0.19) |  | -0.04 (-0.27, 0.19) |  | -0.06 (-0.35, 0.24) |  | -0.06 (-0.28, 0.17) |  |
| **Body Mass Index (BMI)** |  | **0.270** |  | **0.101** |  | **0.905** |  | **0.330** |
| Underweight | 0.35 (-0.51, 1.22) |  | 0.70 (-0.29, 1.70) |  | 0.11 (-0.70, 0.93) |  | 0.11 (-0.65, 0.87) |  |
| Normal | -0.27 (-0.45, -0.09) |  | -0.33 (-0.50, -0.15) |  | -0.32 (-0.49, -0.15) |  | -0.46 (-0.63, -0.29) |  |
| Overweight | -0.07 (-0.23, 0.08) |  | -0.02 (-0.17, 0.13) |  | -0.33 (-0.48, -0.18) |  | -0.29 (-0.45, -0.14) |  |
| Obese | -0.13 (-0.28, 0.02) |  | -0.10 (-0.24, 0.05) |  | -0.29 (-0.44, -0.14) |  | -0.28 (-0.43, -0.13) |  |
| **Depression** |  | **0.203** |  | **0.280** |  | **0.495** |  | **0.507** |
| Yes | -0.39 (-0.73, -0.05) |  | -0.31 (-0.65, 0.03) |  | -0.42 (-0.76, -0.08) |  | -0.21 (-0.55, 0.12) |  |
| No | -0.12 (-0.21, -0.02) |  | -0.10 (-0.19, -0.01) |  | -0.28 (-0.38, -0.19) |  | -0.32 (-0.41, -0.23) |  |
| **Diabetes** |  | **0.402** |  | **0.378** |  | **0.752** |  | **0.260** |
| Yes | -0.05 (-0.22, 0.12) |  | -0.04 (-0.21, 0.13) |  | -0.26 (-0.43, -0.09) |  | -0.20 (-0.37, -0.04) |  |
| No | -0.14 (-0.24, -0.03) |  | -0.12 (-0.23, -0.02) |  | -0.29 (-0.40, -0.19) |  | -0.32 (-0.42, -0.21) |  |
| **Hypertension** |  | **0.846** |  | **0.895** |  | **0.779** |  | **0.945** |
| Hypertension | -0.14 (-0.31, 0.02) |  | -0.10 (-0.27, 0.06) |  | -0.28 (-0.43, -0.12) |  | -0.31 (-0.47, -0.15) |  |
| Non hypertension | -0.12 (-0.23, -0.01) |  | -0.12 (-0.22, -0.01) |  | -0.30 (-0.41, -0.19) |  | -0.31 (-0.42, -0.21) |  |

**Notes:** CI = confidence interval; PIR = poverty income ratio; BMI = body mass index; DII = dietary inflammatory index; CERAD-DR = Establish a Registry for Alzheimer's Disease-Delayed Recall; CERAD-IR = Establish a Registry for Alzheimer's Disease-Immediate Recall; AFT = Animal Fluency Test; DSST = Digit Symbol Substitution Test.

a Composite z-score was set as continuous variable. DII value was divided into two categories: pro-inflammatory diet with a value ≥ 0, while anti-inflammatory diet with a value < 0. stratification factors including gender, age, race, education, marital status, PIR, drinking status, smoking status, sleep disorder, physical activities, BMI, depression, diabetes, and hypertension.

**eTable 2** Associations of DII, work status, and hours worked per week with composite, CERAD-DR, CERAD-IR, AFT, and DSST z-scores, non-multiple imputation data was used.a

| **Independent Variables** | **Composite Z-score** | **CERAD-DR Z-score** | **CERAD-IR Z-score** | **AFT Z-score** | **DSST Z-score** |
| --- | --- | --- | --- | --- | --- |
| ***β* (95%CI) *p*-value** | ***β* (95%CI) *p*-value** | ***β* (95%CI) *p*-value** | ***β* (95%CI) *p*-value** | ***β* (95%CI) *p*-value** |
| **Crude Model (Model 1)** |  |  |  |  |  |
| **DII** |  |  |  |  |  |
| Anti-inflammatory | Reference | Reference | Reference | Reference | Reference |
| Pro-inflammatory | -0.31 (-0.41, -0.20) <0.001 | -0.18 (-0.30, -0.05) 0.007 | -0.25 (-0.37, -0.13) <0.001 | -0.43 (-0.60, -0.26) <0.001 | -0.37 (-0.51, -0.23) <0.001 |
| **Work Status** |  |  |  |  |  |
| Not working | Reference | Reference | Reference | Reference | Reference |
| Working | 0.49 (0.38, 0.59) <0.001 | 0.35 (0.23, 0.46) <0.001 | 0.41 (0.29, 0.53) <0.001 | 0.61 (0.47, 0.75) <0.001 | 0.58 (0.47, 0.69) <0.001 |
| **Hours Worked per Week** |  |  |  |  |  |
| < 30 hours | Reference | Reference | Reference | Reference | Reference |
| 30-40 hours | 0.23 (0.14, 0.32) <0.001 | 0.20 (0.09, 0.31) <0.001 | 0.25 (0.14, 0.35) <0.001 | 0.23 (0.11, 0.34) <0.001 | 0.24 (0.13, 0.35) <0.001 |
| > 40 hours | 0.38 (0.26, 0.49) <0.001 | 0.30 (0.16, 0.45) <0.001 | 0.40 (0.25, 0.54) <0.001 | 0.39 (0.21, 0.57) <0.001 | 0.43 (0.30, 0.55) <0.001 |
| **Partly adjusted Model (Model 2)** |  |  |  |  |  |
| **DII** |  |  |  |  |  |
| Anti-inflammatory | Reference | Reference | Reference | Reference | Reference |
| Pro-inflammatory | -0.19 (-0.28, -0.10) <0.001 | -0.14 (-0.26, -0.01) 0.030 | -0.19 (-0.29, -0.09) <0.001 | -0.24 (-0.39, -0.10) 0.003 | -0.20 (-0.31, -0.08) 0.002 |
| **Work Status** |  |  |  |  |  |
| Not working | Reference | Reference | Reference | Reference | Reference |
| Working | 0.21 (0.12, 0.29) <0.001 | 0.12 (0.01, 0.23) 0.031 | 0.17 (0.05, 0.29) 0.008 | 0.31 (0.19, 0.43) <0.001 | 0.23 (0.11, 0.34) <0.001 |
| **Hours Worked per Week** |  |  |  |  |  |
| < 30 hours | Reference | Reference | Reference | Reference | Reference |
| 30-40 hours | 0.12 (0.04, 0.20) 0.004 | 0.14 (0.02, 0.25) 0.019 | 0.18 (0.06, 0.29) 0.004 | 0.06 (-0.03, 0.16) 0.2 | 0.11 (0.03, 0.20) 0.012 |
| > 40 hours | 0.25 (0.13, 0.37) <0.001 | 0.25 (0.08, 0.42) 0.006 | 0.33 (0.18, 0.48) <0.001 | 0.15 (-0.01, 0.30) 0.059 | 0.28 (0.15, 0.41) <0.001 |
| **Fully adjusted Model (Model 3)** |  |  |  |  |  |
| **DII** |  |  |  |  |  |
| Anti-inflammatory | Reference | Reference | Reference | Reference | Reference |
| Pro-inflammatory | -0.17 (-0.28, -0.05) 0.017 | -0.12 (-0.29, 0.04) 0.10 | -0.18 (-0.31, -0.05) 0.017 | -0.21 (-0.39, -0.02) 0.035 | -0.15 (-0.30, -0.01) 0.043 |
| **Work Status** |  |  |  |  |  |
| Not working | Reference | Reference | Reference | Reference | Reference |
| Working | 0.19 (0.09, 0.29) 0.007 | 0.12 (-0.02, 0.25) 0.071 | 0.16 (0.01, 0.30) 0.040 | 0.29 (0.14, 0.43) 0.005 | 0.20 (0.06, 0.34) 0.017 |
| **Hours Worked per Week** |  |  |  |  |  |
| < 30 hours | Reference | Reference | Reference | Reference | Reference |
| 30-40 hours | 0.12 (0.00, 0.23) 0.045 | 0.14 (-0.02, 0.31) 0.073 | 0.18 (0.02, 0..34) 0.038 | 0.05 (-0.10, 0.20) 0.4 | 0.10 (-0.03, 0.23) 0.091 |
| > 40 hours | 0.25 (0.08, 0.43) 0.019 | 0.27 (0.01, 0.53) 0.047 | 0.35 (0.13, 0.58) 0.015 | 0.13 (-0.08, 0.33) 0.14 | 0.27 (0.08, 0.46) 0.020 |

**Notes**: DII = Dietary Inflammatory Index; PIR = Poverty Income Ratio; BMI = Body Mass Index; CERAD-DR = Establish a Registry for Alzheimer's Disease-Delayed Recall; CERAD-IR = Establish a Registry for Alzheimer's Disease-Immediate Recall; AFT = Animal Fluency Test; DSST = Digit Symbol Substitution Test.

a Model 1 was unadjusted. Model 2 was adjusted for gender, age, education, race, marital status, and PIR. Model 3 was adjusted for gender, age, education, race, marital status, PIR, drinking status, smoking status, sleep disorder, physical activities, BMI, depression, diabetes, and hypertension.

**eTable 3** The moderating effect of work status and hours worked per week on the association of DII with composite, CERAD-DR, CERAD-IR, AFT and DSST z-scores, non-multiple imputation data was used.a

| **Independent Variables** | **Composite Z-score** | **CERAD-DR Z-score** | **CERAD-IR Z-score** | **AFT Z-score** | **DSST Z-score** |
| --- | --- | --- | --- | --- | --- |
| ***β* (95%CI) *p*-value** | ***β* (95%CI) *p*-value** | ***β* (95%CI) *p*-value** | ***β* (95%CI) *p*-value** | ***β* (95%CI) *p*-value** |
| **Crude Model (Model 1)** |  |  |  |  |  |
| **DII × Work Status** |  |  |  |  |  |
| Not working | -0.08 (-0.11, -0.06) <0.001 | -0.05 (-0.08, -0.03) <0.001 | -0.05 (-0.08, -0.03) <0.001 | -0.10 (-0.13, -0.08) <0.001 | -0.13 (-0.15, -0.10) <0.001 |
| Working | -0.07 (-0.10, -0.03) <0.001 | -0.04 (-0.07, -0.02) <0.001 | -0.03 (-0.08, 0.02) 0.191 | -0.09 (-0.15, -0.06) <0.001 | -0.09 (-0.13, -0.04) <0.001 |
| **DII × Hours Worked per Week** |  |  |  |  |  |
| < 30 hours | -0.10 (-0.13, -0.07) <0.001 | -0.08 (-0.11, -0.04) <0.001 | -0.05 (-0.09, -0.02) 0.006 | -0.12 (-0.16, -0.09) <0.001 | -0.14 (-0.18, -0.10) <0.001 |
| 30-40 hours | -0.07 (-0.10, -0.05) <0.001 | -0.04 (-0.08, -0.01) 0.026 | -0.05 (-0.09, -0.01) 0.007 | -0.10 (-0.13, -0.06) <0.001 | -0.11 (-0.15, -0.07) <0.001 |
| > 40 hours | -0.06 (-0.11, -0.02) 0.002 | -0.04 (-0.09, 0.01) 0.147 | -0.04 (-0.09, 0.02) 0.182 | -0.09 (-0.14, -0.04) 0.001 | -0.09 (-0.15, -0.04) <0.001 |
| **Partly adjusted Model (Model 2)** |  |  |  |  |  |
| **DII × Work Status** |  |  |  |  |  |
| Not working | -0.05 (-0.07, -0.04) <0.001 | -0.04 (-0.07, -0.02) 0.002 | -0.04 (-0.07, -0.01) 0.002 | -0.06 (-0.09, -0.04) <0.001 | -0.07 (-0.09, -0.05) <0.001 |
| Working | -0.04 (-0.07, -0.01) 0.014 | -0.03 (-0.08, 0.01) 0.093 | -0.03 (-0.07, 0.02) 0.227 | -0.05 (-0.09, -0.01) 0.028 | -0.04 (-0.08, -0.00) 0.037 |
| **DII × Hours Worked per Week** |  |  |  |  |  |
| < 30 hours | -0.06 (-0.09, -0.04) <0.001 | -0.06 (-0.10, -0.02) 0.002 | -0.04 (-0.08, -0.00) 0.032 | -0.07 (-0.10, -0.03) <0.001 | -0.08 (-0.11, -0.05) <0.001 |
| 30-40 hours | -0.05 (-0.07, -0.03) <0.001 | -0.03 (-0.07, 0.00) 0.055 | -0.04 (-0.08, -0.01) 0.012 | -0.06 (-0.09, -0.03) <0.001 | -0.06 (-0.09, -0.03) <0.001 |
| > 40 hours | -0.03 (-0.06, 0.00) 0.074 | -0.03 (-0.08, 0.02) 0.287 | -0.02 (-0.07, 0.03) 0.415 | -0.03 (-0.08, 0.01) 0.166 | -0.04 (-0.08, -0.00) 0.039 |
| **Fully adjusted Model (Model 3)** |  |  |  |  |  |
| **DII × Work Status** |  |  |  |  |  |
| Not working | -0.05 (-0.06, -0.03) <0.001 | -0.04 (-0.07, -0.01) 0.004 | -0.04 (-0.06, -0.01) 0.005 | -0.05 (-0.07, -0.02) <0.001 | -0.06 (-0.08, -0.03) <0.001 |
| Working | -0.03 (-0.06, -0.00) 0.049 | -0.04 (-0.08, 0.01) 0.121 | -0.03 (-0.07, 0.02) 0.263 | -0.04 (-0.07, -0.01) 0.024 | -0.02 (-0.06, -0.01) 0.010 |
| **DII × Hours Worked per Week** |  |  |  |  |  |
| < 30 hours | -0.05 (-0.08, -0.01) 0.005 | -0.05 (-0.08, -0.01) 0.010 | -0.04 (-0.08, -0.01) 0.020 | -0.06 (-0.10, -0.01) 0.011 | -0.05 (-0.07, -0.02) 0.002 |
| 30-40 hours | -0.04 (-0.07, -0.02) <0.001 | -0.02 (-0.06, 0.02) 0.259 | -0.02 (-0.06, 0.02) 0.258 | -0.04 (-0.08, -0.01) 0.014 | -0.04 (-0.07, -0.02) 0.002 |
| > 40 hours | -0.03 (-0.06, 0.01) 0.106 | -0.04 (-0.09, 0.01) 0.081 | -0.03 (-0.08, 0.01) 0.170 | -0.04 (-0.07, -0.00) 0.028 | -0.05 (-0.09, -0.01) 0.010 |

**Notes**: DII = Dietary Inflammatory Index; PIR = Poverty Income Ratio; BMI = Body Mass Index; CERAD-DR = Establish a Registry for Alzheimer's Disease-Delayed Recall; CERAD-IR = Establish a Registry for Alzheimer's Disease-Immediate Recall; AFT = Animal Fluency Test; DSST = Digit Symbol Substitution Test.

a Model 1 was unadjusted. Model 2 was adjusted for gender, age, education, race, marital status, and PIR. Model 3 was adjusted for gender, age, education, race, marital status, PIR, drinking status, smoking status, sleep disorder, physical activities, BMI, depression, diabetes, and hypertension.

**eTable 4** The moderating effect of work status and hours worked per week on the association of DII with composite, CERAD-DR, CERAD-IR, AFT and DSST z-scores, propensity score matching (PSM) method was used.a

| **Independent Variables** | **Composite Z-score** | **CERAD-DR Z-score** | **CERAD-IR Z-score** | **AFT Z-score** | **DSST Z-score** |
| --- | --- | --- | --- | --- | --- |
| ***β* (95%CI) *p*-value** | ***β* (95%CI) *p*-value** | ***β* (95%CI) *p*-value** | ***β* (95%CI) *p*-value** | ***β* (95%CI) *p*-value** |
| **Crude Model (Model 1)** |  |  |  |  |  |
| **DII × Work Status** |  |  |  |  |  |
| Not working | -0.08 (-0.11, -0.05) <0.001 | -0.05 (-0.09, -0.01) 0.006 | -0.07 (-0.11, -0.03) <0.001 | -0.09 (-0.13, -0.05) <0.001 | -0.10 (-0.14, -0.07) <0.001 |
| Working | -0.04 (-0.09, -0.01) 0.007 | -0.02 (-0.08, 0.05) 0.614 | -0.03 (-0.09, 0.03) 0.366 | -0.06 (-0.13, -0.02) 0.001 | -0.05 (-0.10, -0.02) <0.001 |
| **DII × Hours Worked per Week** |  |  |  |  |  |
| < 30 hours | -0.09 (-0.13, -0.05) <0.001 | -0.07 (-0.12, -0.02) 0.008 | -0.08 (-0.13, -0.03) 0.001 | -0.12 (-0.17, -0.06) <0.001 | -0.09 (-0.14, -0.04) <0.001 |
| 30-40 hours | -0.06 (-0.10, -0.02) 0.002 | -0.03 (-0.08, 0.02) 0.307 | -0.06 (-0.11, -0.01) 0.017 | -0.07 (-0.13, -0.02) 0.006 | -0.08 (-0.13, -0.03) <0.001 |
| > 40 hours | -0.05 (-0.10, 0.01) 0.087 | -0.03 (-0.10, 0.04) 0.418 | -0.02 (-0.09, 0.05) 0.595 | -0.05 (-0.13, 0.02) 0.167 | -0.09 (-0.16, -0.02) 0.012 |
| **Partly adjusted Model (Model 2)** |  |  |  |  |  |
| **DII × Work Status** |  |  |  |  |  |
| Not working | -0.05 (-0.07, -0.03) <0.001 | -0.04 (-0.07, -0.00) 0.037 | -0.05 (-0.09, -0.02) 0.003 | -0.06 (-0.09, -0.02) <0.001 | -0.06 (-0.08, -0.03) <0.001 |
| Working | -0.03 (-0.07, -0.01) 0.001 | -0.01 (-0.07, 0.05) 0.772 | -0.02 (-0.08, 0.04) 0.461 | -0.04 (-0.10, -0.02) 0.032 | -0.05 (-0.06, -0.04) 0.035 |
| **DII × Hours Worked per Week** |  |  |  |  |  |
| < 30 hours | -0.06 (-0.09, -0.03) <0.001 | -0.05 (-0.10, -0.01) 0.024 | -0.06 (-0.11, -0.01) 0.013 | -0.08 (-0.13, -0.03) <0.001 | -0.07 (-0.13, -0.02) 0.007 |
| 30-40 hours | -0.03 (-0.06, -0.00) 0.043 | -0.01 (-0.05, 0.04) 0.830 | -0.04 (-0.09, 0.01) 0.087 | -0.04 (-0.09, -0.00) 0.041 | -0.04 (-0.08, -0.00) 0.035 |
| > 40 hours | -0.04 (-0.08, 0.01) 0.092 | -0.03 (-0.10, 0.03) 0.344 | -0.02 (-0.09, 0.04) 0.464 | -0.02 (-0.09, 0.04) 0.483 | -0.03 (-0.07, 0.00) 0.087 |
| **Fully adjusted Model (Model 3)** |  |  |  |  |  |
| **DII × Work Status** |  |  |  |  |  |
| Not working | -0.04 (-0.07, -0.02) <0.001 | -0.03 (-0.06, 0.00) 0.087 | -0.05 (-0.08, -0.02) 0.004 | -0.05 (-0.08, -0.02) 0.003 | -0.05 (-0.08, -0.02) <0.001 |
| Working | -0.02 (-0.07, -0.00) 0.043 | -0.00 (-0.06, 0.06) 0.932 | -0.03 (-0.09, 0.03) 0.400 | -0.04 (-0.09, -0.03) 0.047 | -0.02 (-0.07, -0.00) 0.043 |
| **DII × Hours Worked per Week** |  |  |  |  |  |
| < 30 hours | -0.05 (-0.08, -0.02) 0.002 | -0.04 (-0.09, 0.00) 0.060 | -0.06 (-0.10, -0.01) 0.016 | -0.07 (-0.12, -0.02) 0.004 | -0.07 (-0.12, -0.02) 0.010 |
| 30-40 hours | -0.03 (-0.06, -0.00) 0.047 | -0.00 (-0.05, 0.04) 0.918 | -0.04 (-0.09, 0.00) 0.079 | -0.04 (-0.09, -0.01) 0.040 | -0.03 (-0.07, -0.01) 0.016 |
| > 40 hours | -0.03 (-0.08, 0.01) 0.157 | -0.02 (-0.09, 0.04) 0.472 | -0.02 (-0.09, 0.04) 0.512 | -0.01 (-0.08, 0.05) 0.725 | -0.03 (-0.07, 0.01) 0.114 |

**Notes**: DII = Dietary Inflammatory Index; PIR = Poverty Income Ratio; BMI = Body Mass Index; CERAD-DR = Establish a Registry for Alzheimer's Disease-Delayed Recall; CERAD-IR = Establish a Registry for Alzheimer's Disease-Immediate Recall; AFT = Animal Fluency Test; DSST = Digit Symbol Substitution Test.

a Model 1 was unadjusted. Model 2 was adjusted for gender, age, education, race, marital status, and PIR. Model 3 was adjusted for gender, age, education, race, marital status, PIR, drinking status, smoking status, sleep disorder, physical activities, BMI, depression, diabetes, and hypertension.


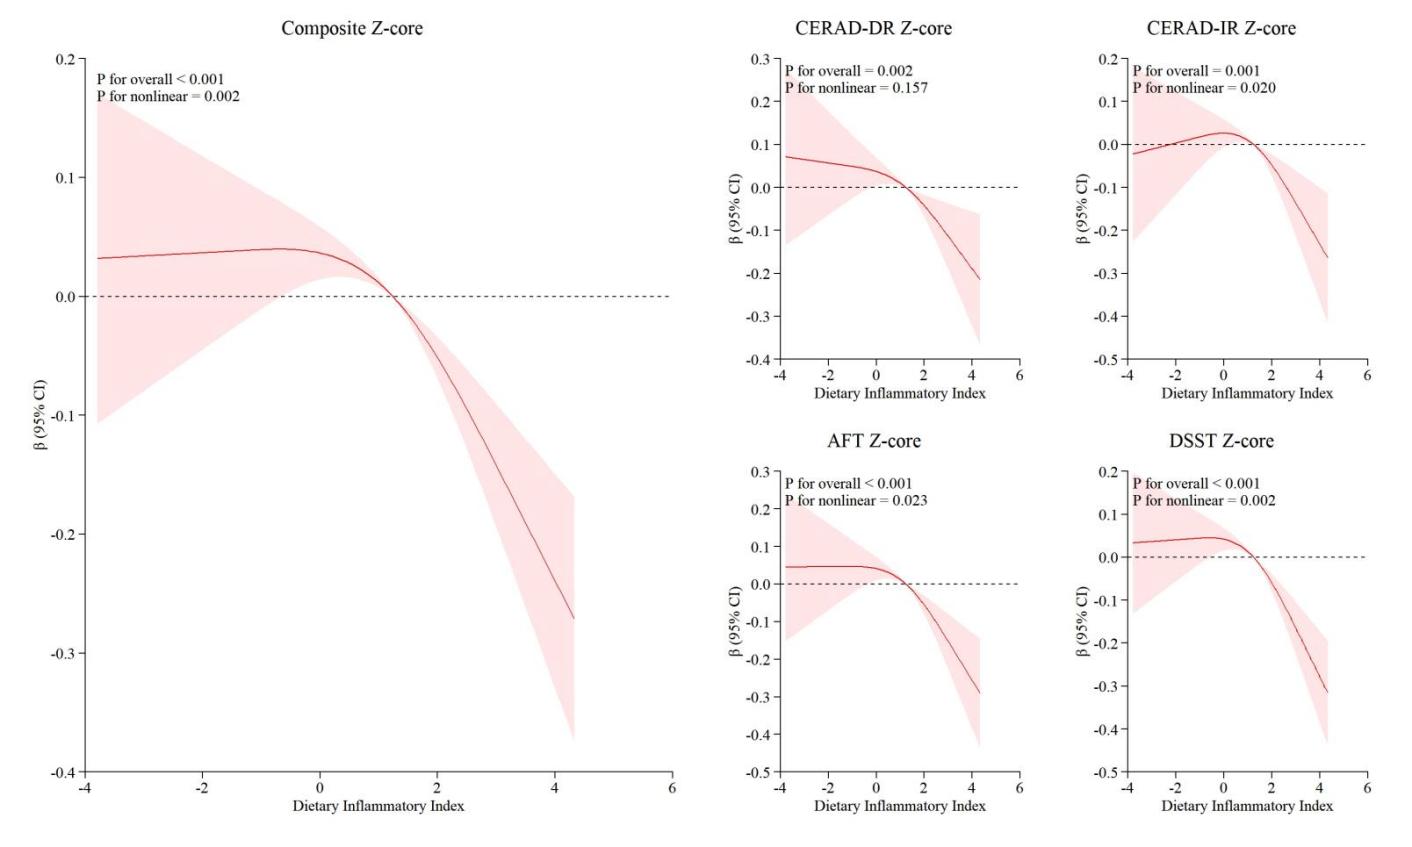


**eFig. 1** The restricted cubic spline (RCS) for the dose-response association of DII scores with composite, CERAD-DR, CERAD-IR, AFT and DSST z-scores.

**Notes:** Non-multiple imputation data was used. The red solid line represents estimates of the adjusted *β* coefficients, the shadow represents 95% confidence intervals, and the reference *β* value was set to zero (dashed black line). All models were adjusted for gender, age, education, race, marital status, PIR, drinking status, smoking status, sleep disorder, physical activities, BMI, depression, diabetes, and hypertension.
